# Supplementary material
Source: Springer Nature journal article supplement (https://www.springermedizin.de/resource/supplementary/12911_2013_824_MOESM1_ESM.pdf/9526724)
Supplement: MOESM1 [file 9526724]

Records identified through  
database searching  
(n = 414)

Additional records identified  
through other sources  
(n = 13)

Duplicates removed  
(n = 1)

Records screened  
(n = 426)

Records excluded  
(n = 385)

Full-text articles assessed  
for eligibility  
(n = 41)

Full-text articles excluded,  
with reasons  
(n = 34)

Studies included in  
qualitative synthesis  
(n = 7)
